# Supplementary material for: Genetic history from the Middle Neolithic to present on the Mediterranean island of Sardinia
Source: PubMed Central journal article supplement (PMC7039977; doi:10.1038/s41467-020-14523-6), 2020-02-24
Supplement: 41467_2020_14523_MOESM7_ESM.pdf [file 41467_2020_14523_MOESM7_ESM.pdf]

**Title:** Supplementary Data 1:

**Description:** Excel File containing 6 sheets describing meta information and results for the 70 genotyped ancient individuals as well as reference individuals included in this study. Importantly, sheet A contains relevant meta information for each newly genotyped individual. The symbol “\_” in the ID column indicates that two libraries have been merged - as three pairs of individuals turned out to be genetically identical (each pair from the same site and with overlapping radiocarbon dates).

**Title:** Supplementary Data 2:

**Description:** Excel file summarizing f-statistics results.

**Title:** Supplementary Data 3:

**Description:** Excel file summarizing individual qpAdm results with 2-5 proximal sources.
